# Supplementary material for: Disruption of the Interaction of RAS with PI 3-Kinase Induces Regression of EGFR-Mutant-Driven Lung Cancer
Source: PubMed Central journal article supplement (PMC6315106; doi:10.1016/j.celrep.2018.12.003), 2018-12-26
Supplement: mmc1.pdf [file mmc1.pdf]

**Cell Reports, Volume 25**

**Supplemental Information**

**Disruption of the Interaction of RAS  
with PI 3-Kinase Induces Regression  
of EGFR-Mutant-Driven Lung Cancer**

**Miguel M. Murillo, Sareena Rana, Bradley Spencer-Dene, Emma Nye, Gordon Stamp, and Julian Downward**

SUPPLEMENTARY FIGURES

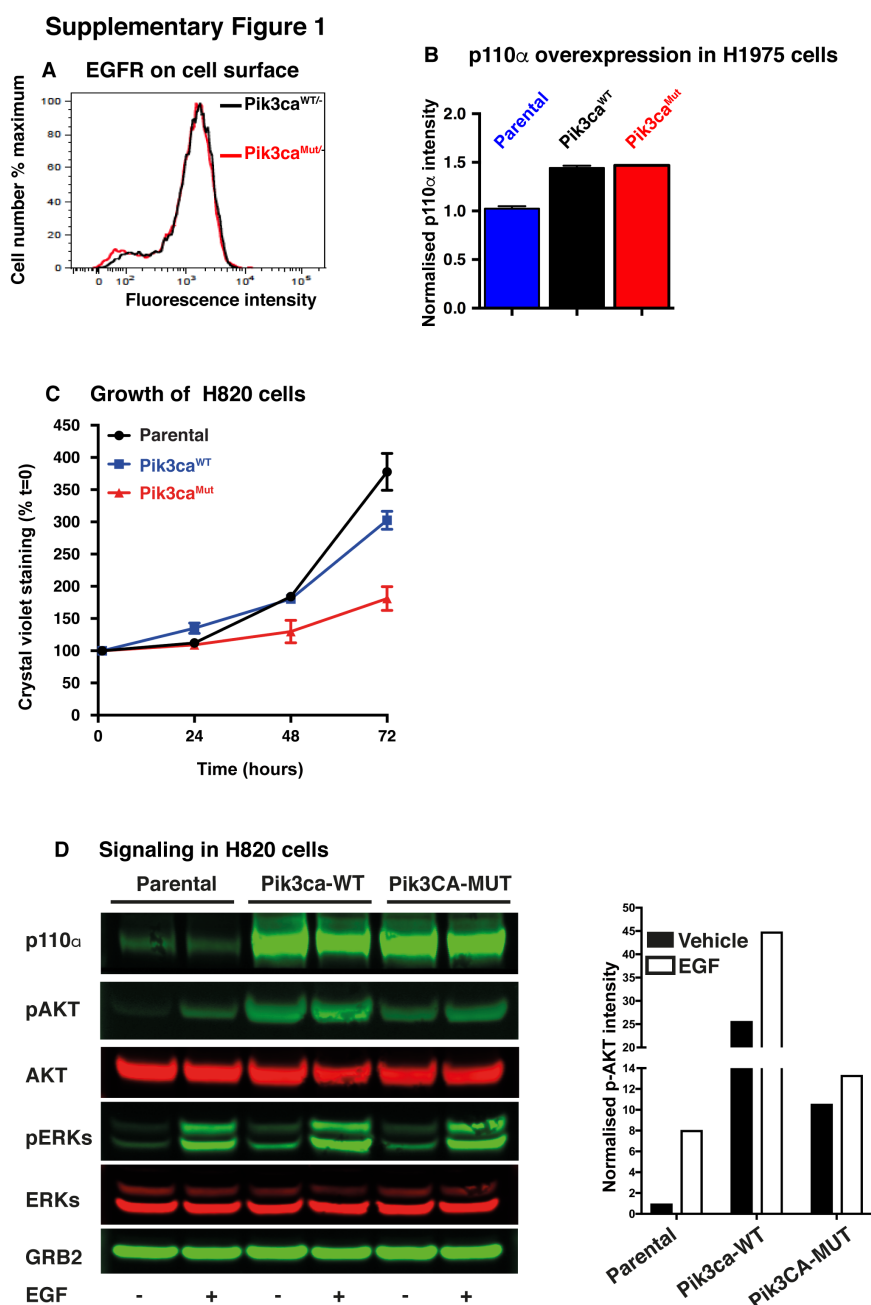

**Supplementary Figure 1, relating to Figure 1.** **A.** *Pik3ca*<sup>WT/-</sup> and *Pik3ca*<sup>MUT/-</sup> MEFs were starved overnight and subjected to FACS analysis to determine the amount of total EGFR on the cell surface. **B.** Quantification of the expression of p110 $\alpha$  in H1975 cells (n=3) expressing either a WT or a MUT version of p110 $\alpha$ , or parental H1975 cells. **C.** H820 EGFR mutant lung cancer cells were infected with retroviruses encoding *Pik3ca*<sup>WT</sup>, *Pik3ca*<sup>MUT</sup> or not infected (parental) and cell growth assays performed with crystal violet staining. **D.** H820 cells from (C) were then starved and stimulated with EGF (10 ng/ml) or vehicle for 10 minutes. Proteins were collected and subjected to Western Blot analysis as indicated.

## Supplementary Figure 2

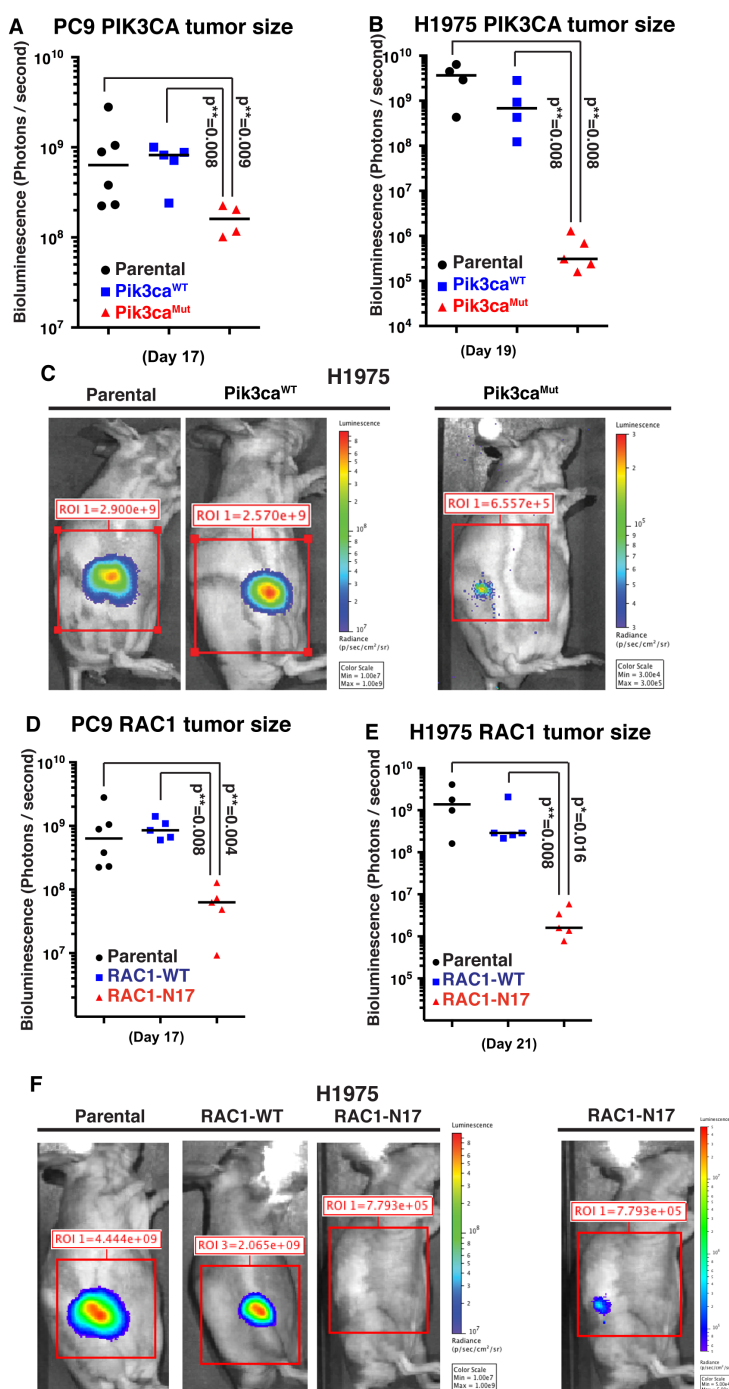

**Supplementary Figure 2, relating to Figure 2.** A and B. Quantification of bioluminescence emission in individual nude mice injected with PC9 or H1775 cells expressing  $Pik3ca^{WT}$  or  $Pik3ca^{MUT}$  at the end of the experiments from figures 2C (Parental PC9 n=6; PC9  $Pik3ca^{WT}$  n=5; PC9  $Pik3ca^{MUT}$  n=4) and 2D (Parental H1775 n=4; H1775  $Pik3ca^{WT}$  n=4; H1775  $Pik3ca^{MUT}$  n=5). C. Images of mice injected with H1775 parental cells, or cells expressing  $Pik3ca^{WT}$  or  $Pik3ca^{MUT}$ . For cells expressing  $Pik3ca^{MUT}$ , the scale was lowered to allow visualization (right panel). D and E. Quantification of bioluminescence emission in individual nude mice injected with PC9 or H1775 cells expressing RAC1<sup>WT</sup> or RAC1<sup>N17</sup> at the end of the experiments from figures 2E (Parental PC9 n=6; PC9 RAC1<sup>WT</sup> n=5; PC9 RAC1<sup>N17</sup> n=5) and 2F (Parental H1775 n=4; H1775 RAC1<sup>WT</sup> n=5; H1775 RAC1<sup>N17</sup> n=5). F. Images of mice injected with H1775 cells expressing RAC1<sup>WT</sup> or RAC1<sup>N17</sup>, or parental cells. For cells expressing RAC1<sup>N17</sup>, the scale was lowered to allow visualization (right panel).

## Supplementary Figure 3

## A Breeding Strategy

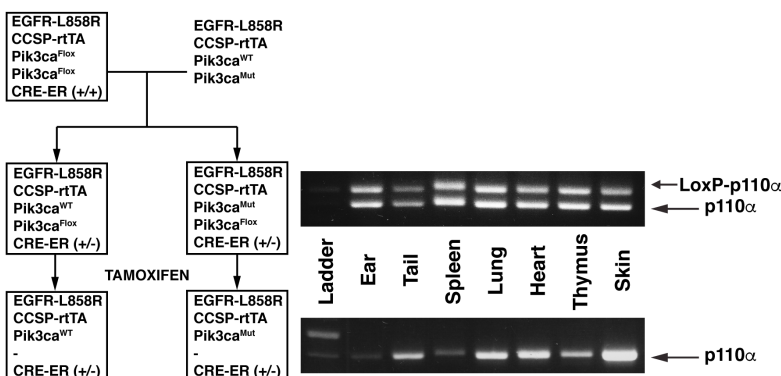

## B Specificity controls

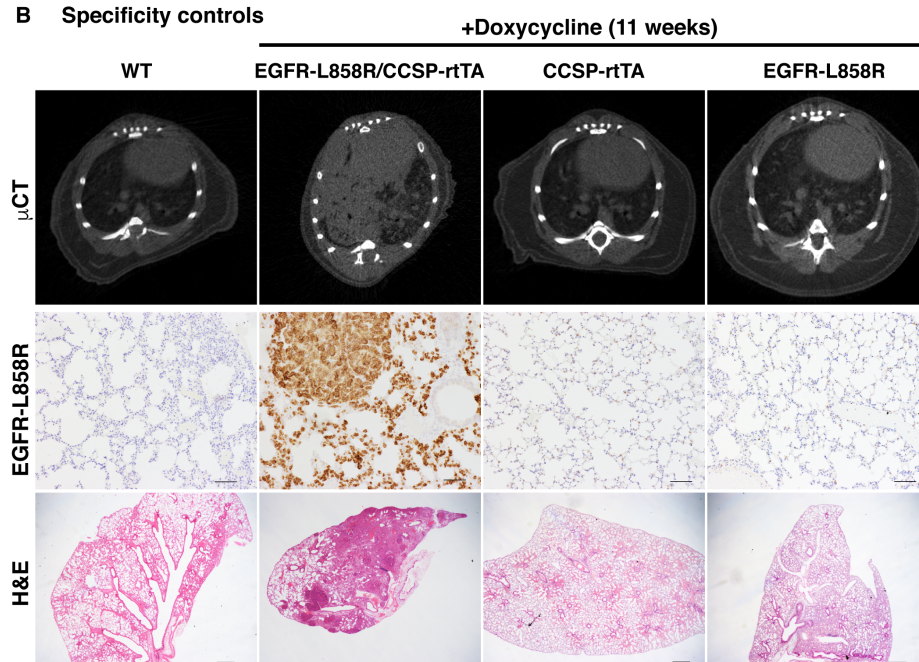

## C Correlation tumor burden / air in lungs

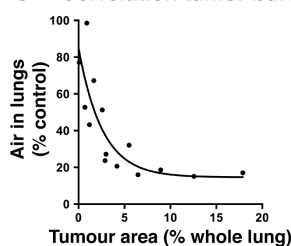

## D Recombination in tumors

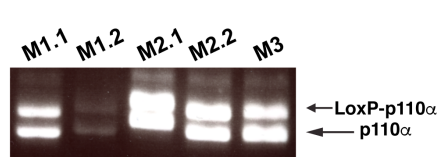

**Supplementary Figure 3, relating to Figure 3. A.** Mouse breeding strategy. Different tissues were analyzed before and after tamoxifen treatment to assess the deletion of the *Pik3ca*<sup>Flox</sup> allele by PCR. Recombination data shown are for mice with *Pik3ca*<sup>Mut</sup> allele. **B.**  $\mu$ CT (top line), EGFR<sup>L858R</sup> staining (central line) and haematoxylin & eosin staining (lower line) of a wild type mouse (far left column), an EGFR<sup>L858R</sup>/CCSP-rtTA<sup>+</sup> mouse (central-left column), an EGFR<sup>L858R</sup>/CCSP-rtTA<sup>+</sup> mouse (central-right column) and a EGFR<sup>L858R</sup>/CCSP-rtTA<sup>+</sup> mouse (far right column). **C.** Plot showing the correlation between air content in the lung measured by  $\mu$ CT versus tumor burden measured in histological samples (n=14). **D.** Tumor samples from EGFR<sup>L858R</sup>- mice were harvested and analyzed to assess the deletion of the *Pik3ca*<sup>Flox</sup> allele by PCR (n=5 from 3 different mice). Scale bars shown are 100 $\mu$ m.



## Supplementary Figure 4

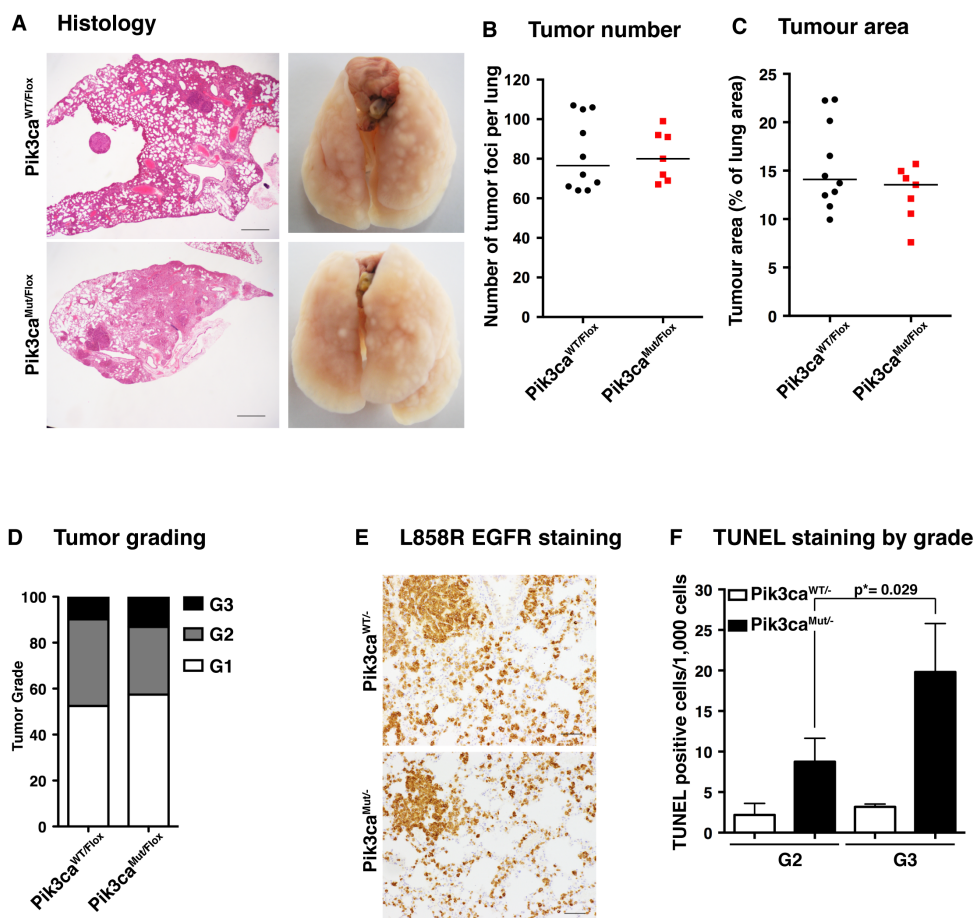

**Supplementary Figure 4, relating to Figure 4.** *Pik3ca*<sup>WT/Flox</sup> and *Pik3ca*<sup>MUT/Flox</sup> mice were fed with doxycycline-containing pellets for 11 weeks and sacrificed before tamoxifen treatment. **A.** Haematoxylin & eosin staining (left) of histological samples and images of ex-vivo lungs (right). **B.** Number of nodules quantified from histological samples. **C.** Representation of the area of the lung occupied by tumor foci quantified from histological samples. **D.** Distribution of tumor foci according to their grade in *Pik3ca*<sup>WT/Flox</sup> and *Pik3ca*<sup>MUT/Flox</sup> mice were fed with doxycycline-containing pellets for 11 weeks. In all cases, *Pik3ca*<sup>WT/Flox</sup> n=10 and *Pik3ca*<sup>MUT/Flox</sup> n=7. **E.** EGFR<sup>L858R</sup> staining in histological samples after 5 days of tamoxifen treatment. **F.** Analysis of apoptosis by TUNEL staining segregated by tumor grade (*Pik3ca*<sup>WT/-</sup> G2 n=4; *Pik3ca*<sup>WT/-</sup> G3 n=3; *Pik3ca*<sup>MUT/-</sup> G2 n=4; *Pik3ca*<sup>MUT/-</sup> G3 n=4). Scale bars shown are 100µm.
